# Supplementary material
Source: publisher site journal article supplement (https://www.dovepress.com/article/428035)
Supplement: Supplementary file 1 [file get_supplementary_file.php]

| Table S1 Sequences of primers used quantitative real-time PCR (qRT-PCR). | | |
| --- | --- | --- |
| Gene | Forward primer (5' to 3') | Reverse primer (5' to 3') |
| HSPA5 | CCAAGAGAGGGTTCTTGAATCTCG | ATGGGCCAGCCTGGATATACAACA |
| SQSTM1 | GACTACGACTTGTGTAGCGTC | AGTGTCCGTGTTTCACCTTCC |
| β-ACTIN | TTCTACAATGAGCTGCGTGTG | GGGGTGTTGAAGGTCTCAAA |
